# Supplementary material
Source: PubMed Central journal article supplement (PMC7322165)
Supplement: NIHMS1560890-supplement-Suppl_Fig_1.pdf [file NIHMS1560890-supplement-Suppl_Fig_1.pdf]

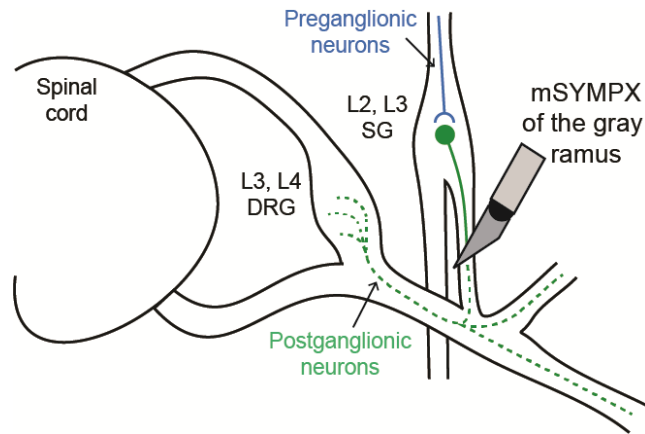

**Supplementary Figure 1. Schematic of the local surgical “microsympathectomy” (mSYMPX).** Schematic representations of the mSYMPX surgery which consisted of cutting of the gray rami from L2 and L3 postganglionic sympathetic ganglia. In green is a representation of a postganglionic sympathetic cell in the paravertebral ganglia, which is innervated by preganglionic neurons (blue) in the intermediolateral column of the thoracic and upper lumbar spinal cord. Diagram is not to scale.
