# Supplementary material
Source: PubMed Central journal article supplement (PMC7322165)
Supplement: NIHMS1560890-supplement-Suppl_Fig_2.pdf [file NIHMS1560890-supplement-Suppl_Fig_2.pdf]

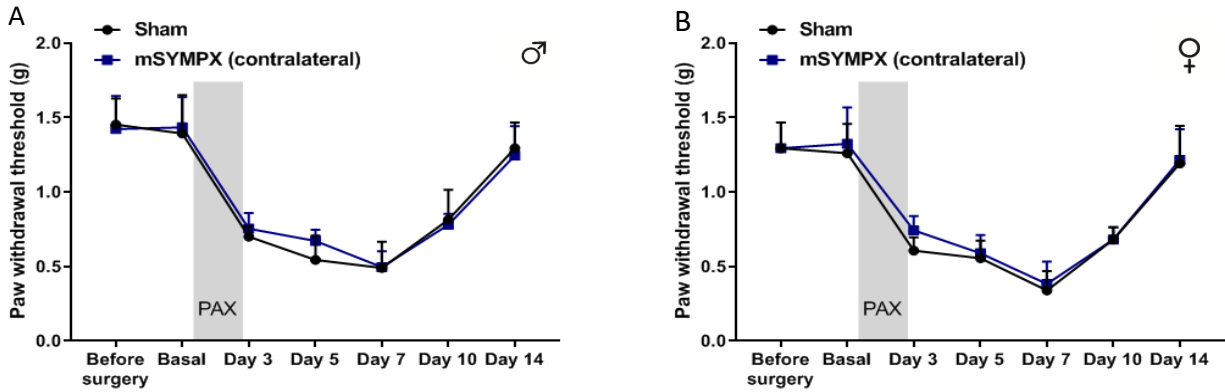

**Supplementary Figure 2. Local “microsympathectomy” (mSYMPX) does not change paclitaxel-induced mechanical allodynia in contralateral hind paws.** Time course of paclitaxel-induced mechanical allodynia tested in contralateral hind paws in (A) male mice (n=5 male mice/group, two-way ANOVA showed no significant difference between mSYMPX and sham groups, Group x Time interaction:  $F_{6,48} = 0.3682$ ,  $p = 0.895$ ) and (B) female mice (n=5 female mice/group, two-way ANOVA showed no significant difference between mSYMPX and sham groups, Group x Time interaction:  $F_{6,48} = 0.2384$ ,  $p = 0.961$ ).
