# Supplementary material
Source: PubMed Central journal article supplement (PMC7322165)
Supplement: NIHMS1560890-supplement-Suppl_Fig_3.pdf [file NIHMS1560890-supplement-Suppl_Fig_3.pdf]

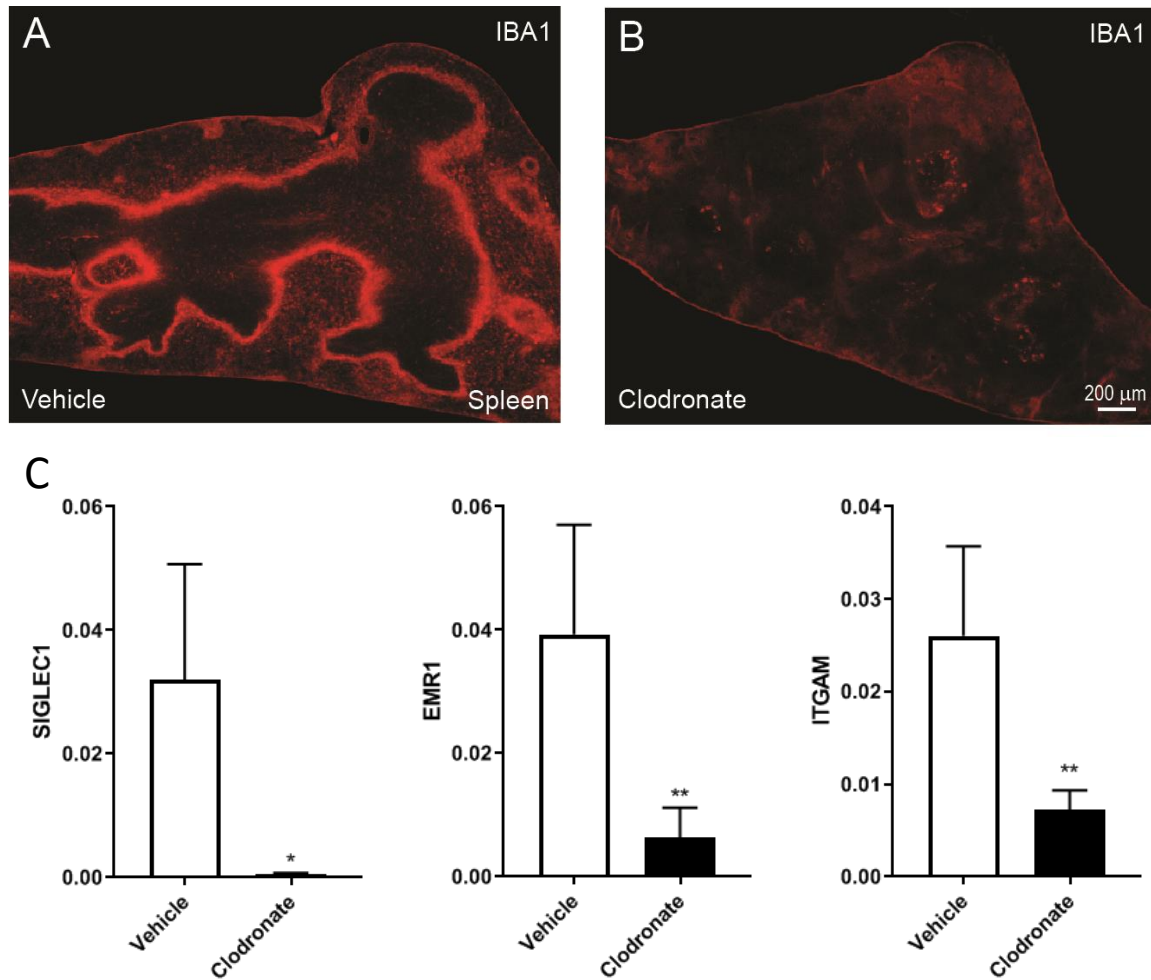

**Supplemental Figure 3. Depletion of monocytes/macrophages in spleen of clodronate treated mice.** Representative staining of ionized calcium binding adaptor molecule 1 (IBA1) protein in spleen of (A) vehicle- vs. (B) clodronate-treated mSYMPX mice at day 10 of chemotherapy. (C) Real-time RT-PCR analysis showing mRNA expression levels of various well-characterized monocyte/macrophage markers in spleen of vehicle- vs. clodronate- treated mSYMPX mice at day 10 of chemotherapy. Statistical analysis was performed using t-test (n=4/group). \*p<0.05, \*\*p<0.01 compared to sham-mice. mSYMPX = local “microsympathectomy”. Primer sequences are described in the Supplementary Table 1.
