# Supplementary material
Source: PubMed Central journal article supplement (PMC7322165)
Supplement: NIHMS1560890-supplement-Suppl_Tab_1__1_.pdf [file NIHMS1560890-supplement-Suppl_Tab_1__1_.pdf]

**Supplementary Table 1. Primer sequences, Related to Methods.**

| <b>Gene</b>                    | <b>Forward primer</b>     | <b>Reverse Primer</b>     | <b>Accession Number</b> |
|--------------------------------|---------------------------|---------------------------|-------------------------|
| <b>CD68</b>                    | TGTCTGATCTTGCTAGGACCG     | GAGAGTAACGGCCTTTTTGTGA    | NM_001291058.1          |
| <b>IBA1</b>                    | ATCAACAAGCAATTCCTCGATGA   | CAGCATTTCGCTTCAAGGACATA   | NM_019467.2             |
| <b>ITGAM</b>                   | CCATGACCTTCCAAGAGAATGC    | ACCGGCTTGTGCTGTAGTC       | NM_001082960.1          |
| <b>CX3CR1</b>                  | GAGTATGACGATTCTGCTGAGG    | CAGACCGAACGTGAAGACGAG     | NM_009987.4             |
| <b>CCR2</b>                    | ATCCACGGCATACTATCAACATC   | CAAGGCTCACCATCATCGTAG     | NM_009915.2             |
| <b>CCL2</b>                    | TTAAAAACCTGGATCGGAACCAA   | GCATTAGCTTCAGATTTACGGGT   | NM_011333.3             |
| <b>CD163</b>                   | ATGGGTGGACACAGAATGGTT     | CAGGAGCGTTAGTGACAGCAG     | NM_053094.2             |
| <b>NOS2</b>                    | GGAGTGACGGCAAACATGACT     | TAGCCAGCGTACCGGATGA       | NM_001313922.1          |
| <b>IL6</b>                     | ACAACCACGGCCTTCCTAC       | TCCACGATTCCCAGAGAACA      | NM_001314054.1          |
| <b>IL1<math>\beta</math></b>   | CAACCAACAAGTGATATTCTCCATG | GATCCACACTCTCCAGCTGCA     | NM_008361.4             |
| <b>TNF<math>\alpha</math></b>  | TCTCATGCACCACCATCAAGGACT  | TGACCACTCTCCCTTTGCAGAACT  | NM_013693.3             |
| <b>ARG1</b>                    | TTGGGTGGATGCTCACACTG      | TTGCCATGCAGATTCCC         | NM_007482.3             |
| <b>IL4</b>                     | CTGTAGGGCTTCCAAGGTGCTTCG  | CCAT TTGCATGATGCTCTTTAGGC | NM_021283.2             |
| <b>IL10</b>                    | GGTTGCCAAGCCTTATCGGA      | ACCTGCTCCACTGCCTTGCT      | NM_010548.2             |
| <b>TGF<math>\beta</math></b>   | TGGAGCAACATGTGGAATC       | CAGCAGCCGGTTACCAAG        | NM_011577.2             |
| <b>TGF<math>\beta</math>R1</b> | TCTGCATTGCACTTATGCTGA     | AAAGGGCGATCTAGTGATGGA     | NM_009370.3             |
| <b>SIGLEC1</b>                 | TGTATTTGACGGTGTGATGACCA   | GCAGCCTCTT TCAATGCTAAGG   | NM_011426.3             |
| <b>EMR1</b>                    | CTTTGGCTATGGGCTTCCAGT     | GCAAGGAGGACAGAGTTTATCGTG  | NM_010130.4             |
| <b>ITGAM</b>                   | CCATGACCTTCCAAGAGAATGC    | ACCGGCTTGTGCTGTAGTC       | NM_008401.2             |
| <b>GAPDH</b>                   | AGGTCGGTGTGAACGGATTG      | GGGGTCGTTGATGGCAACA       | NM_001289726.1          |
