# Supplementary material
Source: PubMed Central journal article supplement (PMC7322165)
Supplement: NIHMS1560890-supplement-Suppl_Tab_2__1_.pdf [file NIHMS1560890-supplement-Suppl_Tab_2__1_.pdf]

**Supplementary Table 2: Electrophysiological parameters of sensory neurons in whole DRG microelectrode recordings, Related to Figure 6.**

| C- cells <sup>a</sup>  |                      |                      |
|------------------------|----------------------|----------------------|
|                        | vehicle              | TGF- $\beta$ blocker |
| n                      | 28                   | 29                   |
| Threshold (mv)         |                      |                      |
| mean (SEM)             | -33.0 (1.6)          | -36.2 (1.7)          |
| median (95%CI)         | -31 (-39, -28)       | -36 (-28, -42)       |
| AP duration (msec)     |                      |                      |
| mean (SEM)             | 2.39 (0.13)          | 2.59 (0.22)          |
| median (95%CI)         | 2.41 (1.98, 2.70)    | 2.24 (2.70, 1.92)    |
| rheobase (nA)          |                      |                      |
| mean (SEM)             | 1.28 (0.24)          | 1.38 (0.22)          |
| median (95%CI)         | 0.90 (0.30, 1.80)    | 1.10 (1.80, 0.50)    |
| Resting potential (mV) |                      |                      |
| mean (SEM)             | -57.5 (1.5)          | -59.7 (1.6)          |
| median (95%CI)         | -56.2 (-61.3, -53.9) | -59.4 (-53.9, -65.3) |
| Max # AP               |                      |                      |
| mean (SEM)             | 2.5 (0.6)            | 5.5 (1.1)            |
| median (95%CI)         | 1.0 (1.0, 3.0)       | 2.5 (3.0, 1.0)*      |
| % firing multiple AP   | 32.0                 | 50.0                 |
| A cells <sup>a</sup>   |                      |                      |
|                        | vehicle              | TGF-B blocker        |
| n                      | 43                   | 41                   |
| Threshold (mv)         |                      |                      |
| mean (SEM)             | -46.2 (1.0)          | -43.8 (0.9)          |
| median (95%CI)         | -46.0 (-48, -43)     | -43.0 (-43, -46)*    |
| AP duration (msec)     |                      |                      |
| mean (SEM)             | 0.86 (0.04)          | 0.90 (0.03)          |
| median (95%CI)         | 0.77 (0.71, 0.89)    | 0.87 (0.89, 0.80)    |
| rheobase (nA)          |                      |                      |
| mean (SEM)             | 1.45 (0.16)          | 1.26 (0.10)          |
| median (95%CI)         | 1.20 (0.80, 1.80)    | 1.20 (1.80, 0.80)    |

|                        |                      |                      |
|------------------------|----------------------|----------------------|
| Resting potential (mV) |                      |                      |
| mean (SEM)             | -64.7 (1.0)          | -64.4 (0.8)          |
| median (95%CI)         | -63.7 (-67.0, -61.3) | -64.5 (-61.3, -66.9) |
| Max # AP               |                      |                      |
| mean (SEM)             | 7.0 (1.7)            | 5.8 (1.5)            |
| median (95%CI)         | 1 (1, 4)             | 2 (4, 1)             |
| % firing multiple AP   | 36.6                 | 43.6                 |

<sup>a</sup> A cells, presumed myelinated, action potential duration <1.5 msec; C cells, presumed unmyelinated, action potential duration >1.5 msec. \*, significantly different from vehicle group (Mann-Whitney test). AP, action potential. CI, confidence interval. Max # AP, maximum number of action potentials elicited during 270 msec suprathreshold current injections.
